# Supplementary material for: Trypanosoma cruzi DNA Polymerase β Is Phosphorylated In Vivo and In Vitro by Protein Kinase C (PKC) and Casein Kinase 2 (CK2)
Source: MDPI journal article supplement (doi:10.3390/cells11223693), 2022-11-21
Supplement: s1 [file s1]

CLUSTAL 2.1 multiple sequence alignment

[illegible]

**Figure S2: Alignment of Wee1 amino acid sequences.** Multiple sequence alignment using the ClustalW algorithm (<https://www.genome.jp/tools-bin/clustalw>) was performed using the following sequences: AAH70052.1 Wee1 homolog (*S. pombe*) [*Homo sapiens*]; NP\_587933.1 protein kinase Wee1 [*Schizosaccharomyces pombe*]; KAF8293196.1 putative Wee1-like protein kinase [*Trypanosoma cruzi*].
